# Supplementary material for: De Novo Transcriptome Analysis Reveals Potential Thermal Adaptation Mechanisms in the Cicada Hyalessa fuscata
Source: MDPI journal article supplement (doi:10.3390/ani11102785), 2021-09-24
Supplement: s1 [file s1]

**Supplementary Material Figure S1.** A diagram showing the experimental heat array.

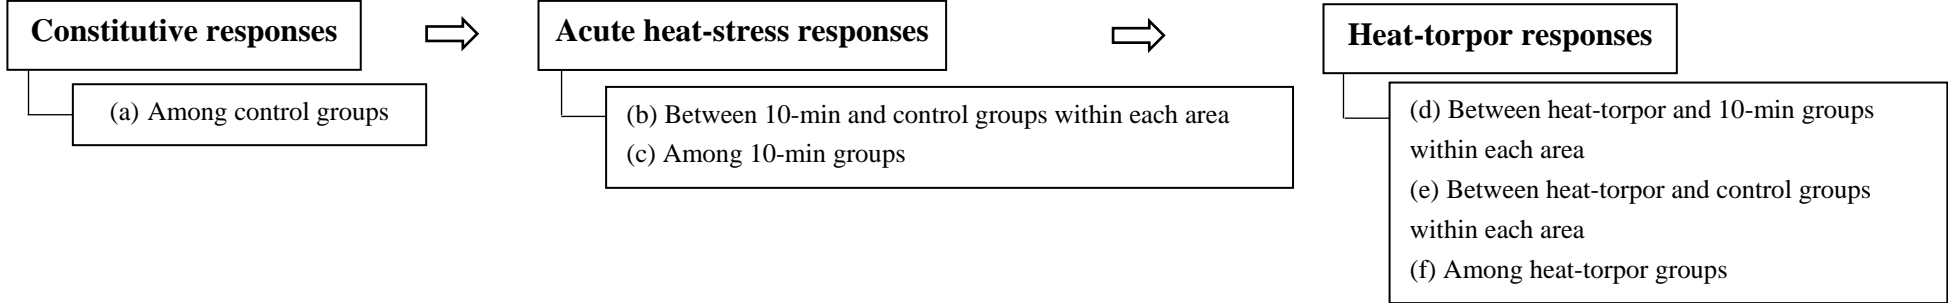

**Supplementary Material Table S1.** A summary of transcriptome sequencing data with accession number of each sample. Q20 value represents the percentage of bases with a Phred quality score > 20, Q30 a Phred quality score > 30. Body temperatures of controlled individuals were not recorded. NA: not available. Seocho, Nowon and Jookyo represent high-UHI, low-UHI and surrounding areas, respectively.

| Sample              | Accession number | Examined temperature (°C) | Read count | Raw data       |         |         | Read count | Clean data     |         |         |
|---------------------|------------------|---------------------------|------------|----------------|---------|---------|------------|----------------|---------|---------|
|                     |                  |                           |            | GC content (%) | Q20 (%) | Q30 (%) |            | GC content (%) | Q20 (%) | Q30 (%) |
| Seocho_Heat-torpor1 | SRR8223459       | 48.9                      | 63,049,544 | 43.4           | 97.62   | 93.8    | 61,058,718 | 43.37          | 98.61   | 95.49   |
| Seocho_Heat-torpor2 | SRR8223458       | 48.3                      | 66,491,564 | 42.76          | 97.73   | 94.15   | 64,575,320 | 42.73          | 98.7    | 95.79   |
| Seocho_Heat-torpor3 | SRR8223465       | 46.1                      | 72,651,622 | 43.0           | 97.29   | 92.61   | 70,567,074 | 42.97          | 98.32   | 94.36   |
| Seocho_10min1       | SRR12603778      | 45.1                      | 82,218,656 | 41.01          | 96.08   | 91.11   | 76,975,974 | 40.98          | 98.17   | 94.48   |
| Seocho_10min2       | SRR12603777      | 46.8                      | 83,419,176 | 41.29          | 96.69   | 92.25   | 79,014,330 | 41.25          | 98.40   | 95.05   |
| Seocho_10min3       | SRR12603776      | 42.9                      | 86,932,330 | 41.24          | 97.14   | 93.10   | 83,222,432 | 41.21          | 98.55   | 95.40   |
| Seocho_Control1     | SRR8223464       | NA                        | 68,039,300 | 40.87          | 97.61   | 93.93   | 66,169,080 | 40.82          | 98.64   | 95.63   |
| Seocho_Control2     | SRR8223463       | NA                        | 78,195,124 | 42.03          | 97.77   | 94.33   | 76,216,042 | 41.96          | 98.73   | 95.92   |
| Seocho_Control3     | SRR8223462       | NA                        | 76,961,634 | 40.26          | 97.51   | 93.73   | 74,462,202 | 40.22          | 98.59   | 95.56   |
| Nowon_Heat-torpor1  | SRR8223457       | 43.7                      | 67,183,422 | 42.94          | 97.7    | 94.11   | 65,307,186 | 42.88          | 98.69   | 95.77   |
| Nowon_Heat-torpor2  | SRR8223456       | 41.6                      | 71,937,470 | 41.22          | 97.76   | 94.25   | 69,897,642 | 41.17          | 98.71   | 95.86   |
| Nowon_Heat-torpor3  | SRR8223449       | 41.8                      | 80,866,470 | 41.8           | 97.67   | 94.12   | 78,649,532 | 41.73          | 98.69   | 95.81   |
| Nowon_10min1        | SRR12603775      | 40.2                      | 77,189,240 | 40.90          | 96.90   | 92.59   | 72,208,166 | 41.25          | 98.40   | 95.01   |
| Nowon_10min2        | SRR12603774      | 48.1                      | 86,251,220 | 41.57          | 96.98   | 92.76   | 73,708,062 | 41.43          | 98.30   | 94.73   |
| Nowon_10min3        | SRR12603773      | 44.8                      | 84,412,456 | 42.73          | 97.19   | 93.13   | 76,022,904 | 41.49          | 98.17   | 94.41   |
| Nowon_Control1      | SRR8223448       | NA                        | 82,840,596 | 41.84          | 97.87   | 94.57   | 80,873,938 | 41.77          | 98.79   | 96.11   |
| Nowon_Control2      | SRR8223461       | NA                        | 81,135,142 | 42.0           | 97.74   | 94.36   | 79,047,022 | 41.92          | 98.76   | 96.04   |
| Nowon_Control3      | SRR8223460       | NA                        | 67,511,472 | 39.69          | 98.15   | 95.15   | 66,129,196 | 39.66          | 98.89   | 96.39   |

|                     |             |      |            |       |       |       |            |       |       |       |
|---------------------|-------------|------|------------|-------|-------|-------|------------|-------|-------|-------|
| Jookyo_Heat-torpor1 | SRR8223451  | 46.0 | 78,470,074 | 42.71 | 97.74 | 94.19 | 76,499,626 | 42.65 | 98.65 | 95.71 |
| Jookyo_Heat-torpor2 | SRR8223450  | 39.9 | 79,338,712 | 41.5  | 97.6  | 93.9  | 77,261,946 | 41.44 | 98.58 | 95.52 |
| Jookyo_Heat-torpor3 | SRR8223453  | 46.2 | 72,894,416 | 43.23 | 97.61 | 93.97 | 70,912,696 | 43.16 | 98.62 | 95.64 |
| Jookyo_10min1       | SRR12603772 | 43.4 | 77,189,240 | 40.90 | 96.90 | 92.59 | 73,644,456 | 40.86 | 98.42 | 95.09 |
| Jookyo_10min2       | SRR12603771 | 42.4 | 86,251,220 | 41.57 | 96.98 | 92.76 | 82,293,132 | 41.52 | 98.46 | 95.18 |
| Jookyo_10min3       | SRR12603770 | 43.5 | 84,412,456 | 42.73 | 97.19 | 93.13 | 80,814,960 | 42.69 | 98.56 | 95.40 |
| Jookyo_Control1     | SRR8223452  | NA   | 85,213,910 | 41.19 | 97.43 | 93.66 | 82,659,800 | 41.12 | 98.54 | 95.49 |
| Jookyo_Control2     | SRR8223455  | NA   | 69,432,638 | 40.59 | 97.6  | 93.9  | 67,320,710 | 40.57 | 98.58 | 95.54 |
| Jookyo_Control3     | SRR8223454  | NA   | 86,341,120 | 43.46 | 97.43 | 93.48 | 83,214,332 | 43.43 | 98.52 | 95.33 |
